# Supplementary material
Source: Springer Nature journal article supplement (https://www.springermedizin.de/resource/supplementary/12943_2009_567_MOESM3_ESM.pdf/9554988)

**A.** FasL: SSLEKQIGHPS<sup>136</sup>  
 +S E Q G +P  
 CD40L: ENSFEMQKGDQNP<sup>120</sup>

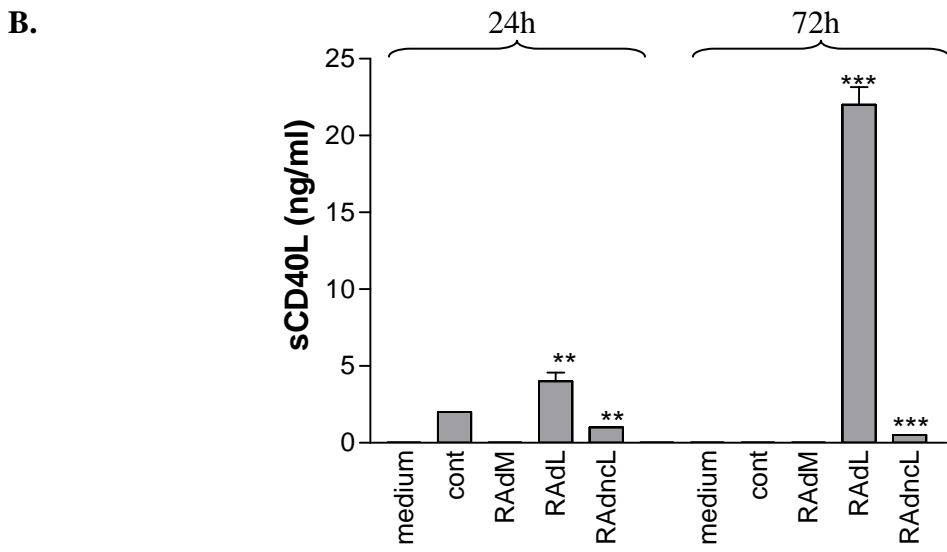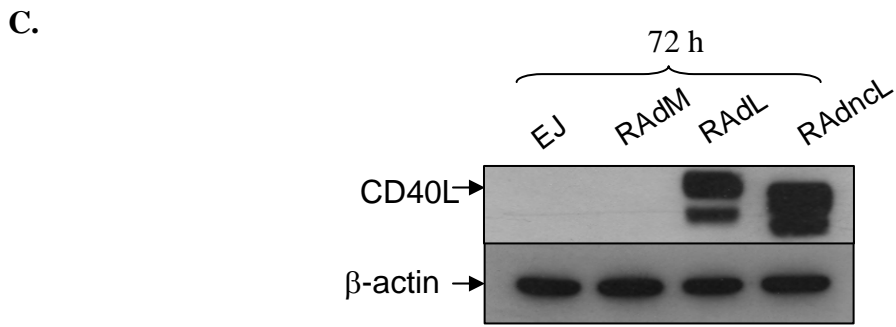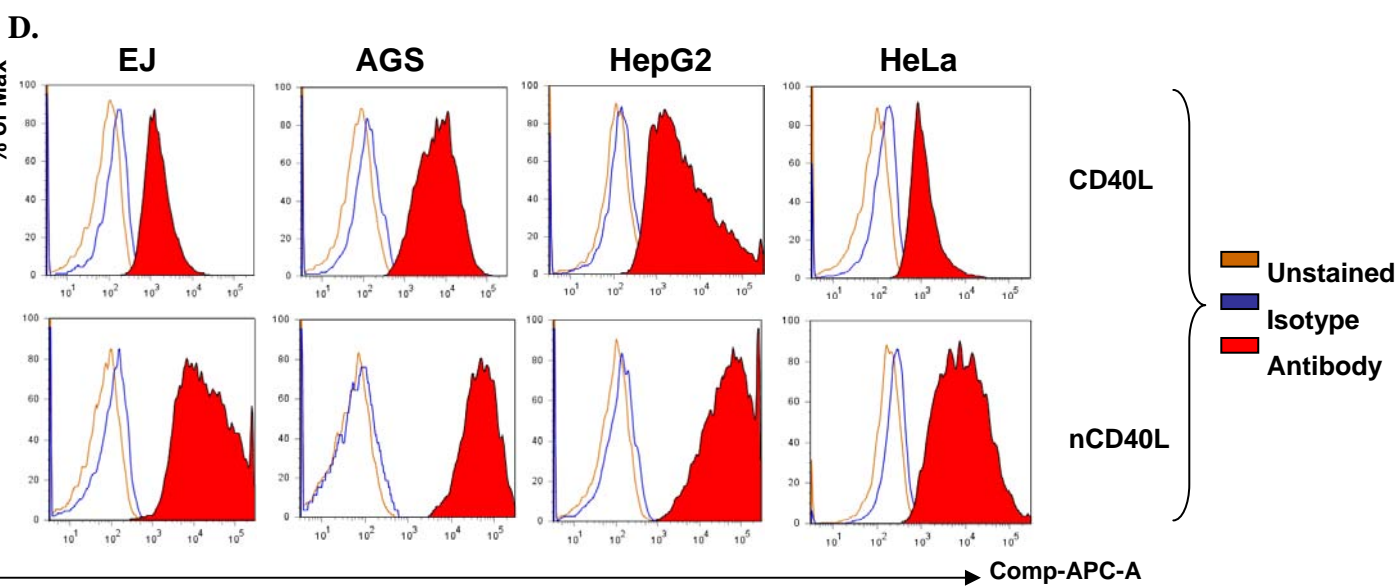

Supplement: MOESM3 [file 9554988]
